# Supplementary material
Source: Royal Society of Chemistry journal article supplement (doi:10.1039/d6en00055j)
Supplement: d6en00055j1.pdf [file d6en00055j1.pdf]

**One-step Synthesis of Fe-Doped Metal-Organic Framework  
Nanozymes for Colorimetric Detection and Removal of Tetracycline  
Antibiotics**

Mengru Shan<sup>a</sup>, Yufeng Zhang<sup>a</sup>, Haobin Jin<sup>a</sup>, Siyu Luo<sup>a</sup>, Yanqing Cong<sup>a</sup>, Shiwen Lv<sup>a</sup>,  
Jing Xu<sup>b</sup> and Yi Zhang<sup>a,\*</sup>

<sup>a</sup>Zhejiang Key Laboratory of Solid Waste Pollution Control and Resource Utilization,  
School of Environmental Science and Engineering, Zhejiang Gongshang University,  
Hangzhou 310018, China

<sup>b</sup>School of Statistics and Mathematics, Zhejiang Gongshang University, Hangzhou  
310018, China

## Text

### Text S1 Chemicals and reagents

$\text{Co}(\text{NO}_3)_2 \cdot 6\text{H}_2\text{O}$ ,  $\text{Fe}(\text{NO}_3)_3 \cdot 9\text{H}_2\text{O}$ ,  $\text{Cu}(\text{NO}_3)_2 \cdot 3\text{H}_2\text{O}$ ,  $\text{Ce}(\text{NO}_3)_2 \cdot 8\text{H}_2\text{O}$ ,  $\text{Zn}(\text{NO}_3)_2 \cdot 6\text{H}_2\text{O}$ ,  $\text{Ni}(\text{NO}_3)_2 \cdot 6\text{H}_2\text{O}$ , Tetracycline (TC), Oxytetracycline (OTC), Doxycycline (DOX), Doxycycline hydrochloride (DHC), Glucose (Glu), Histidine (His), Erythromycin, sulfamethoxazole (SMX), amoxicillin (AMX), ammonium oxalate, p-benzoquinone (PBQ), tert butanol (TBA), acetic acid, 3,3',5,5'-tetramethylbenzidine (TMB), Nfion perfluorinated resin solution (Nafion), Methanol, Ethanol and Isopropyl alcohol were provided from Shanghai McLean. 2-methylimidazole (2-MIM) and Dimethyl sulfoxide (DMSO) were purchased from Aladdin, Shanghai. Sinopharm Chemical Reagent Co., Ltd provided Bisphenol A (BPA), Potassium chloride (KCl), Magnesium chloride hexahydrate ( $\text{MgCl}_2 \cdot 6\text{H}_2\text{O}$ ), Sodium chloride (NaCl), Sodium acetate anhydrous and Calcium chloride ( $\text{CaCl}_2$ ). Carbon cloth was purchased from Nantong senyou Carbon Fiber Co., Ltd. Hangzhou Jingong Special Gas Co., Ltd provided  $\text{O}_2$  (99.99%) and  $\text{N}_2$  (99.99%). All the chemicals were used without further purification. All chemical reagents are analytical grade.

### Text S2 The optimal preparation conditions and optimal detection conditions

All absorbance measurements conducted to determine the optimal preparation conditions and optimal detection conditions were performed under the following conditions: ZIF-67/Fe-6 (2 mg/mL, 50  $\mu\text{L}$ ), TC (80 mg/L, 100  $\mu\text{L}$ ),  $\text{H}_2\text{O}_2$  (0.04 M, 50  $\mu\text{L}$ ), TMB (0.02 M, 50  $\mu\text{L}$ ), sodium acetate-acetic acid buffer (0.2 M, pH 4.0, 3750  $\mu\text{L}$ ). The mixture was incubated for 10 minutes for color development, and absorbance was measured at 652 nm using a UV-Vis spectrophotometer. Three sets of parallel experiments are conducted on one data point and the average value, standard deviation and relative standard deviation are calculated through eq. S 1, 2 and 3.

$$\bar{x} = \frac{1}{n} \sum_{i=1}^n x_i \quad (\text{S1})$$

$$S = \sqrt{\frac{1}{n-1} \sum_{i=1}^n (x_i - \bar{x})^2} \quad (S2)$$

$$RSD (\%) = \frac{S}{\bar{x}} \times 100\% \quad (S3)$$

Where  $n$  and  $i$  represent the number of parallel groups and the number of data,  $x_i$  is the sum of the data,  $\bar{x}$  is the average value of the data,  $S$  is the standard deviation and RSD is relative standard deviation.

### **Text S3 Apparatus and characterization**

The morphology of the catalyst was characterized by scanning electron microscopy (SEM, EISS Sigma 360). The distribution and proportion of elements on the catalyst were characterized by using secondary electron detector and energy dispersive X-ray spectrometer (EDS, Oxford Xplore 50). The phase structure was characterized by X-ray diffractometer (XRD, Rigaku SmartLab SE). X-ray photoelectron spectroscopy (XPS) was collected on Thermo Scientific K-Alpha. Use electron paramagnetic resonance (EPR, Bruker EMXPlus) spectrometer to identify free radicals. The Zeta potential was tested by the UK-based Malvern Zetasizer Pro.

The electrochemical performance of ZIF-67/Fe-6 was analyzed by CHI660E electrochemical workstation. In the three-electrode system at 0.2 M NaAc-HAc buffer solution (pH = 4.0),  $1 \times 1 \text{ cm}^2$  ZIF-67/Fe-6, platinum plate, and Silver/Silver Chloride electrode (Ag/AgCl) are used as working electrodes, counter electrodes, and reference electrodes, respectively. First, prepare the ZIF-67/Fe-6 electrode ( $1 \times 1 \text{ cm}^2$ ) using carbon paper and Nafion solution. Ultrasonic the Nafion (1%) mixture containing 10 mg of ZIF-67/Fe-6 for 5 minutes. Then, take 20  $\mu\text{L}$  of the mixture each time and drop-coat it on the carbon paper three times, followed by natural air-drying. In addition, the ZIF-67-3, ZIF-67-6, and ZIF-67/Fe-3 electrodes were all prepared in the same way, except that 10 mg of ZIF-67/Fe-6 was replaced with 10 mg of ZIF-67-3, ZIF-67-6, and ZIF-67/Fe-3 respectively. Linear sweep voltammetry (LSV), cyclic voltammetry (CV), and Tafel measurements are all conducted in 100 mL of NaAc-HAc buffer solution (0.2 M, pH = 4.0). Electrochemical Impedance Spectroscopy (EIS) is tested in 100 mL of an electrolyte composed of 0.165 g of potassium ferricyanide, 0.211 g of potassium

ferrocyanide, and 0.7455 g of potassium chloride. The impedance of different electrodes is also tested in a three electrode system.

#### **Text S4 DFT**

We used the DFT as implemented in the CP2K 2024.3 in all calculations. The exchange-correlation potential is described by using Grimme's DFT-D3 with (Beck-Johnson )BJ factormodified generalized gradient approximation of Perdew-Burke-Ernzerhof (GGA-PBE-D3(BJ)) during all calculations. During DFT calculations, The convergence criteria of 1.0 E-06 for electron step, max atomic force of 4.5 E-4, max geometry change of 3 E-3 were set to ensure that structures are fully optimized and the electron wave function had converged to a stable state so that the energy of the system could remain stable.<sup>1-4</sup> The DZVP-MOLOPT-SR-GTH basis set was used during geometry optimization & vibrational frequencies, and TZV2P-MOLOPT-SR-GTH basis set during single point calculations. All wavefunction analysis was carried out on Multiwfn 3.8 Dev.<sup>5, 6</sup> The opted structures and charge density difference plots are visualized by VESTA.<sup>7</sup>

#### **Text S5 Detection of TCs in actual samples**

The lake water was collected from Mohu Lake of Zhejiang Gongshang University, and the river water was collected from the inland river of Qiantang River in Qiantang District. Spiked into actual water samples to prepare TCs at different concentrations.

#### **Text S6 The removal of TCs**

In the experiment of degrading TCs, the concentrations of H<sub>2</sub>O<sub>2</sub> and the catalyst are kept the same as those in the detection system. The concentration of TCs is uniformly 2 mg/L, and the content of TCs is detected by high performance liquid chromatography (HPLC). The separation was carried out on a C18 chromatographic column (4.6 mm × 250 mm, 5 μm). The mobile phase consisted of methanol and 0.01 M aqueous oxalic acid solution with a volume ratio of 47:53. The flow rate was set at 1.0 mL/min, and the detection wavelength was 355 nm. The column temperature was maintained at 30 °C, and the injection volume was 20 μL.<sup>8</sup>

$$\text{Removal percent (\%)} = (1 - C_t / C_0) \times 100\%$$

where,  $C_0$  and  $C_t$  represent the concentrations (mg/L) of TCs of initial and time-

dependent after both adsorption and degradation, respectively.

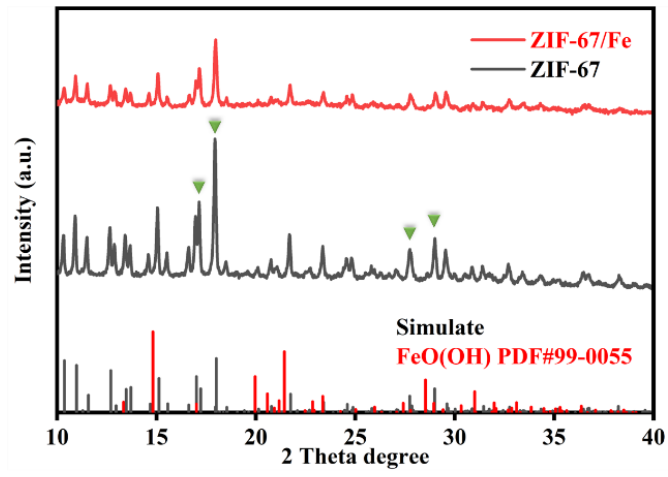

Fig. S1 XRD patterns of ZIF-67 and ZIF-67/Fe-6.

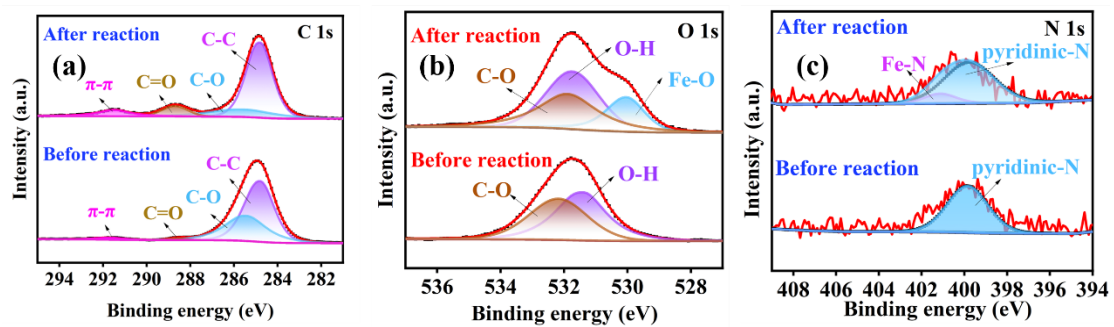

**Fig. S2** (a) The C 1s XPS spectrum of ZIF-67/Fe-6. (b) The O 1s XPS spectrum of ZIF-67/Fe-6. (c) The N 1s XPS spectrum of ZIF-67/Fe-6.

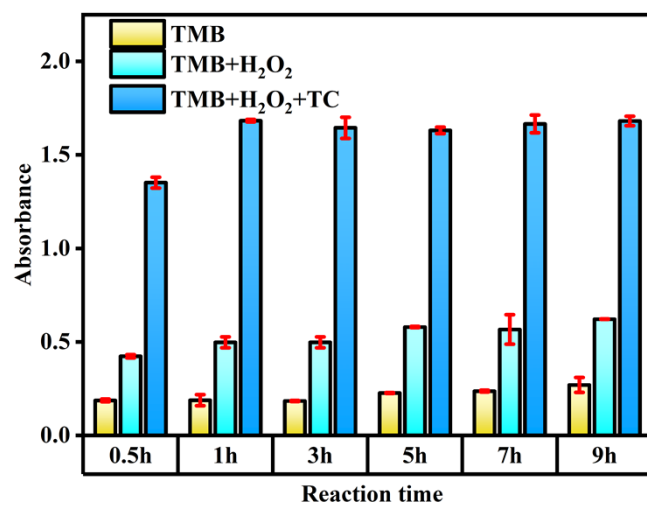

**Fig. S3** Different preparation time of ZIF-67/Fe-6. Experimental conditions: ZIF-67/Fe-6: 2 mg/mL<sup>-1</sup>, TMB: 0.25 mM, H<sub>2</sub>O<sub>2</sub>: 0.5 mM, TC: 2 mg/L.

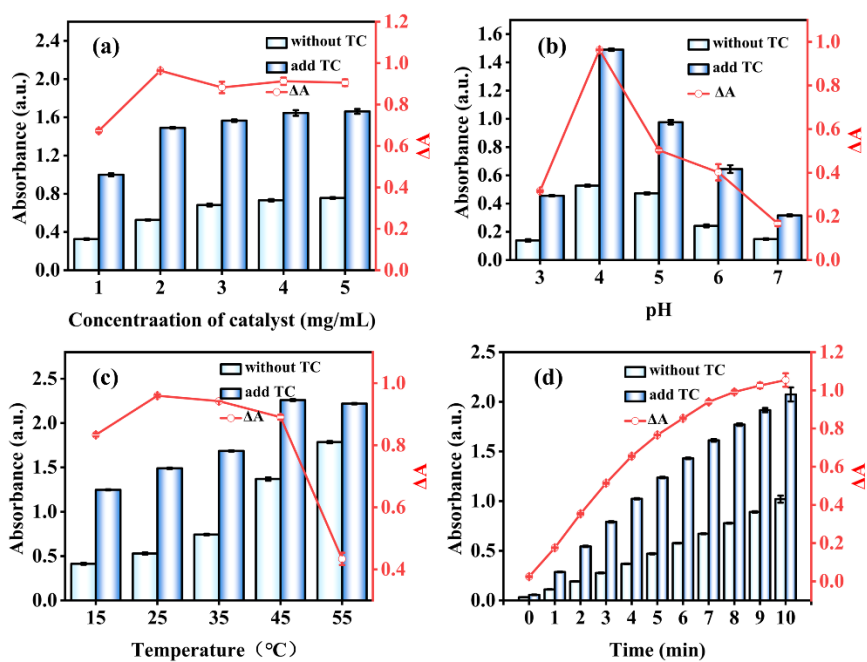

**Fig. S4** The optimal reaction conditions for ZIF-67/Fe-6. (a) The concentration of ZIF-67/Fe-6. (b) The pH of sodium acetate-acetic acid buffer solution. (c) The temperature of the reaction system. (d) The concentration of TMB and  $H_2O_2$ .

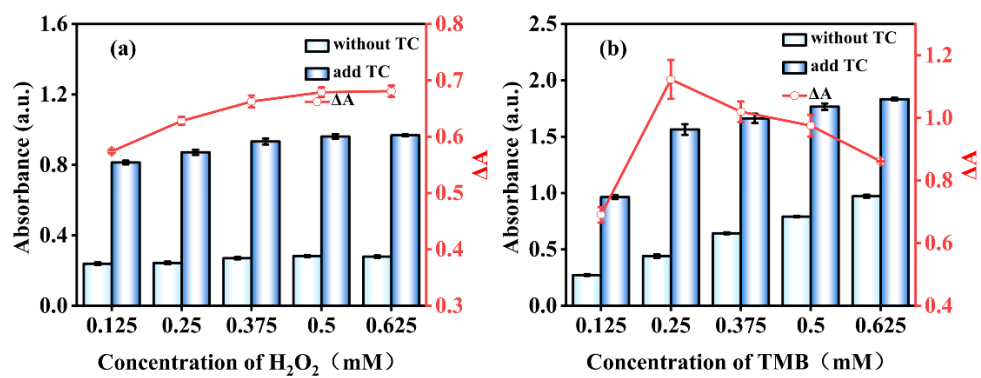

**Fig. S5** Selection of optimal concentrations for H<sub>2</sub>O<sub>2</sub> and TMB. (a) H<sub>2</sub>O<sub>2</sub>. (b) TMB.

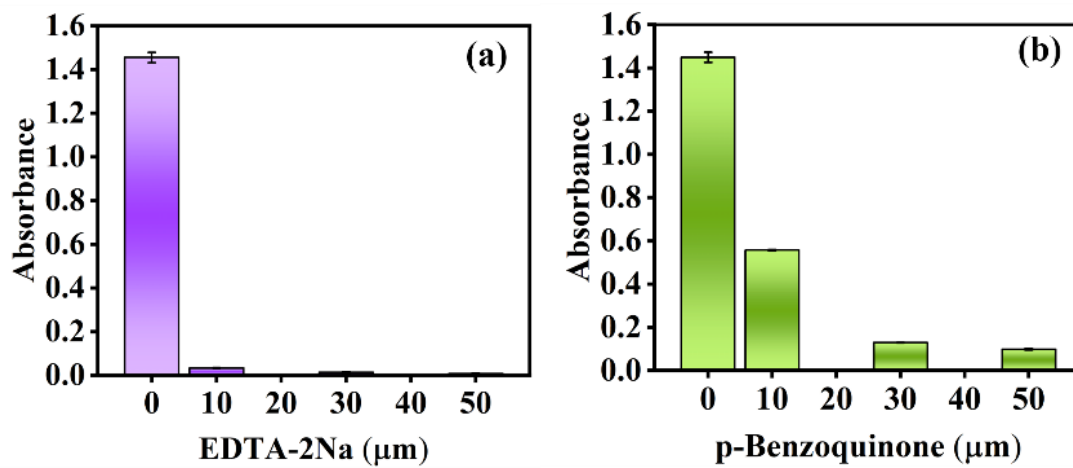

**Fig. S6** The inhibitory effect of free-radical scavengers at different concentration gradients on the absorbance at 652 nm. (a) EDTA-2Na. (b) p-Benzoquinone.

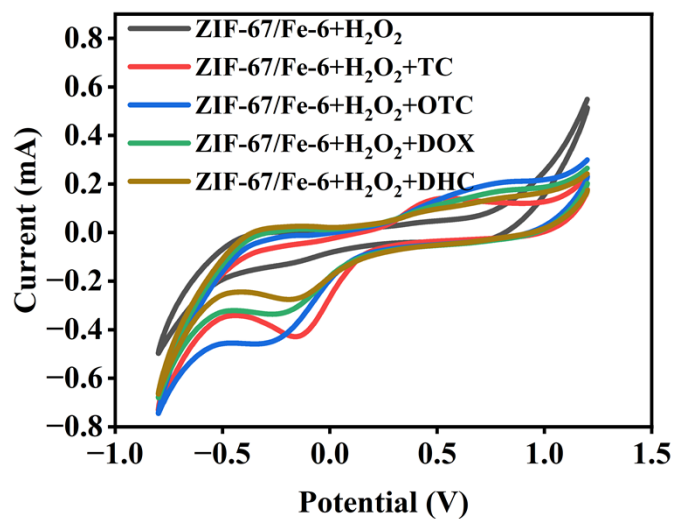

**Fig. S7** Cyclic voltammograms between ZIF-67/Fe-6 and tetracyclines (TC, OTC, DOX and DHC).

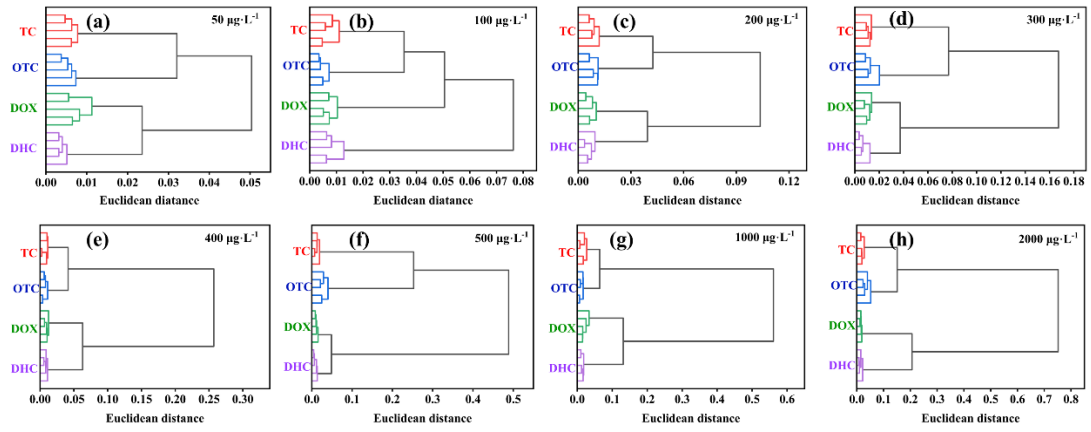

**Fig. S8** Hierarchical Clustering Analysis of TCs at Various Concentrations.

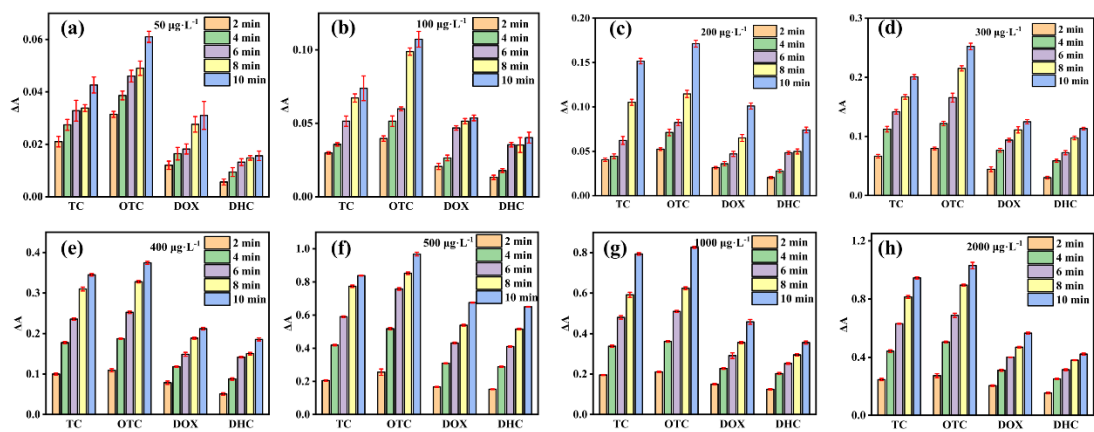

**Fig. S9** Fingerprint Profiles of TCs at Different Concentrations.

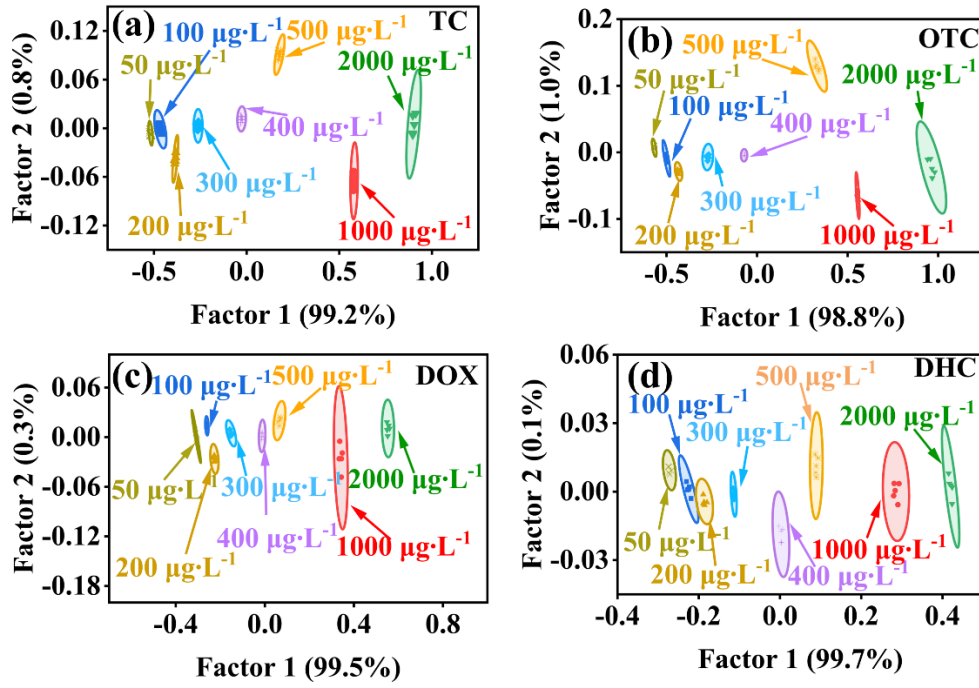

**Fig. S10.** LDA plots of TCs at various concentrations: (a), OTC (b), DOX (c) and DHC (d).

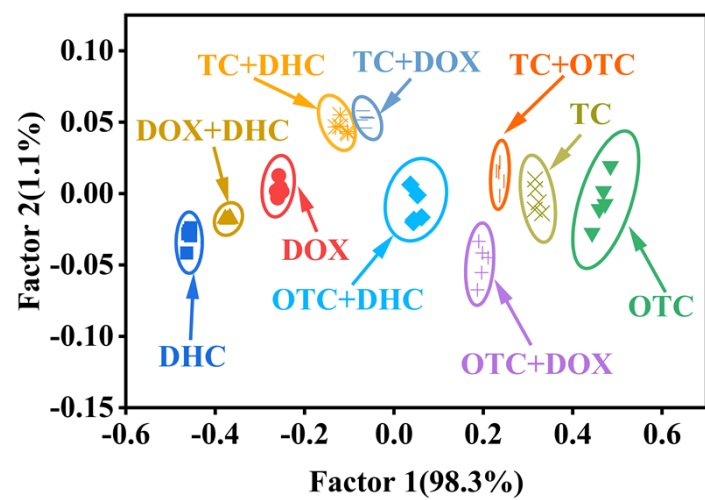

Fig. S11 LDA plot of the equimolar mixture of four TCs.

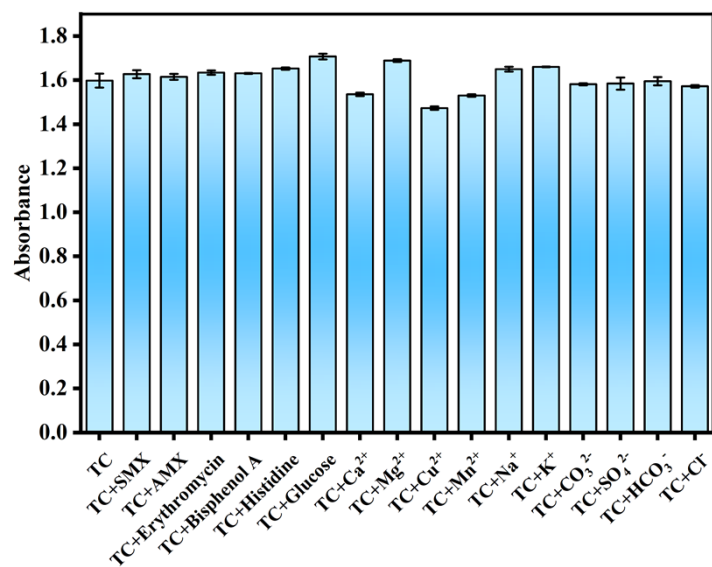

**Fig. S12** The interference effects of other antibiotics, phenolic compounds, metal salts, and inorganic anions on the detection of TC.

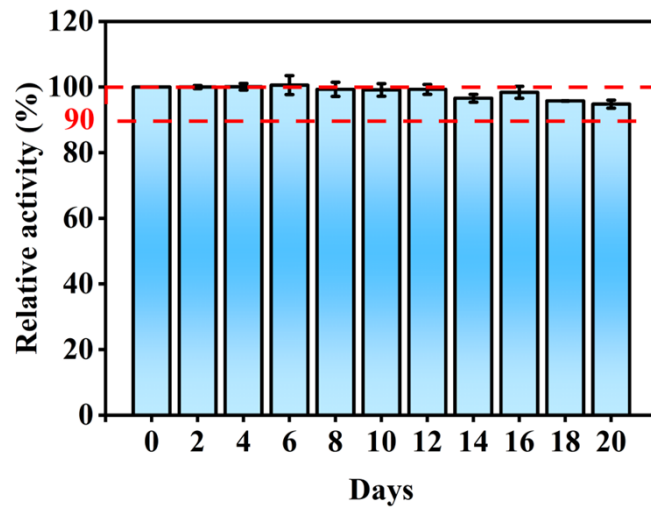

**Fig. S13** ZIF-67/Fe-6 20-Day stability assay.

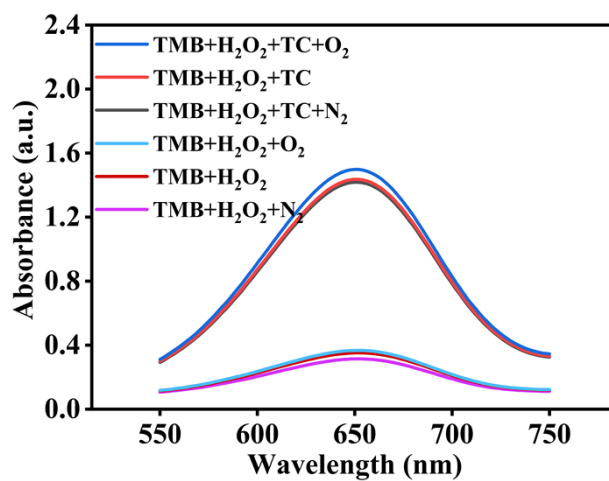

**Fig. S14** Effect of Nitrogen (N<sub>2</sub>) and Oxygen (O<sub>2</sub>) on Absorbance.

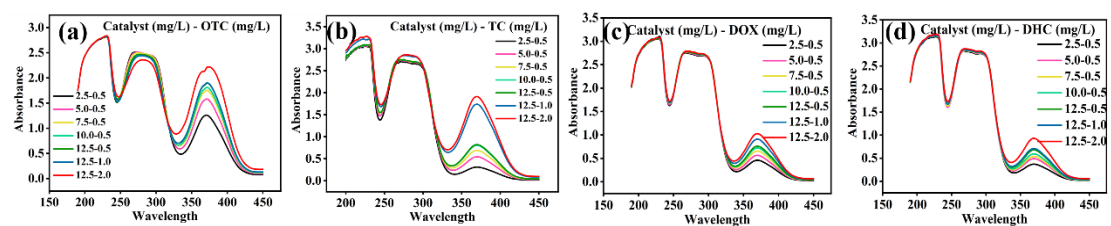

**Fig. S15** UV-vis absorption spectra of ZIF-67/Fe-6 and TCs at different mass concentration ratios (ZIF-67/Fe-6 : TCs, mg/L): 2.5 : 0.5, 5.0 : 0.5, 7.5 : 0.5, 10.0 : 0.5, 12.5 : 0.5, 12.5 : 1.0, 12.5 : 2.0. (a) OTC. (b) TC. (c) DOX. (d) DHC.

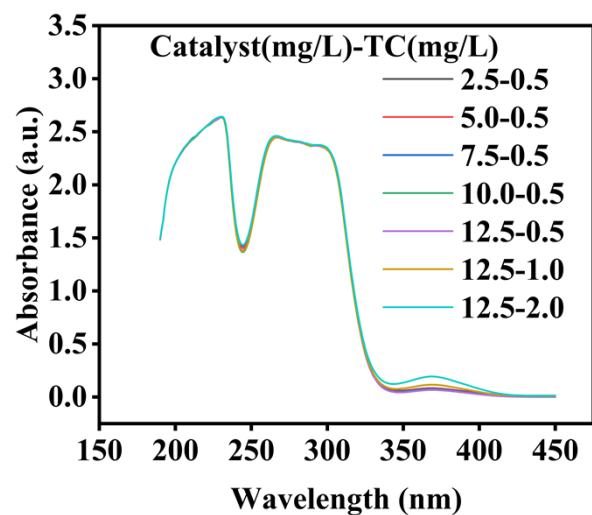

**Fig. S16** UV-vis absorption spectra of ZIF-67 and TC at different mass concentration ratios (ZIF-67 : TC, mg/L): 2.5 : 0.5, 5.0 : 0.5, 7.5 : 0.5, 10.0 : 0.5, 12.5 : 0.5, 12.5 : 1.0, 12.5 : 2.0.

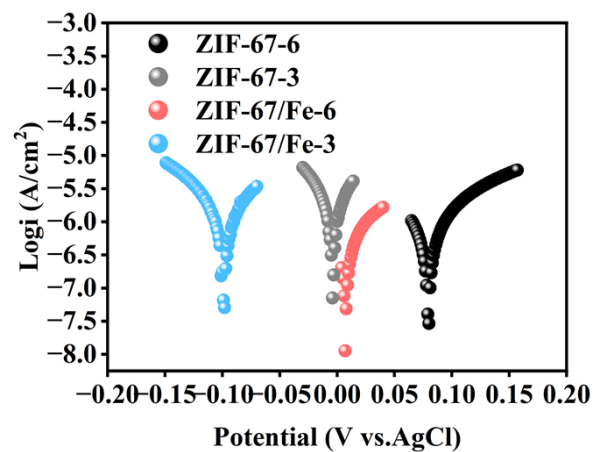

**Fig. S17** Tafel polarization curves of ZIF-67-6, ZIF-67-3, ZIF-67/Fe-6 and ZIF-67/Fe-3.

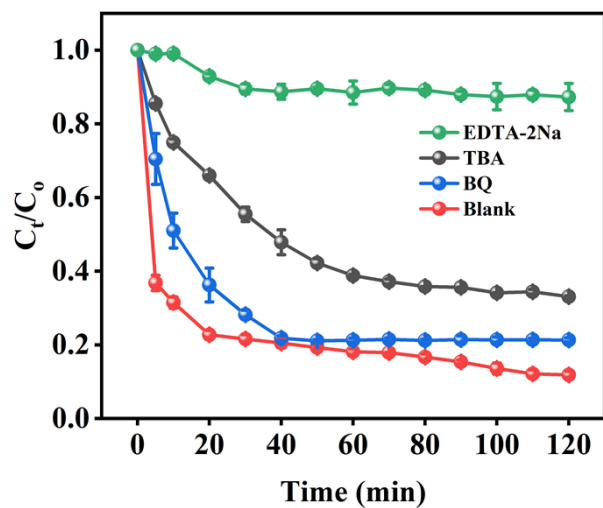

**Fig. S18** Capture agent experiments for TC degradation by ZIF-67/Fe-3.

**Table S1:** Comparison of the enzymatic kinetic parameters

| Materials                                                          | TMB                 |                                            | H <sub>2</sub> O <sub>2</sub> |                                            | Ref.      |
|--------------------------------------------------------------------|---------------------|--------------------------------------------|-------------------------------|--------------------------------------------|-----------|
|                                                                    | K <sub>m</sub> (mM) | V <sub>max</sub><br>(10 <sup>-8</sup> M/s) | K <sub>m</sub> (mM)           | V <sub>max</sub><br>(10 <sup>-8</sup> M/s) |           |
| ZIF-67/Fe-6                                                        | 0.839               | 1.942                                      | 0.109                         | 3.87                                       | This work |
| ZIF-67/Fe-3                                                        | 1.142               | 1.891                                      | 0.174                         | 3.71                                       | This work |
| HRP                                                                | 0.43                | 10.0                                       | 3.7                           | 8.71                                       | 9         |
| Fe <sub>3</sub> O <sub>4</sub> MNPs                                | 154                 | 9.78                                       | 0.098                         | 3.44                                       | 9         |
| Co <sub>3</sub> O <sub>4</sub> @Co-Fe oxide DSNCs                  | 0.48                | 5.32                                       | 0.24                          | 5.18                                       | 10        |
| Co-Fe oxide                                                        | 0.54                | 4.07                                       | 0.33                          | 3.56                                       | 10        |
| Co <sub>3</sub> O <sub>4</sub> SSNCs                               | 1.09                | 2.66                                       | 0.80                          | 2.33                                       | 10        |
| NH <sub>2</sub> -MIL-88B                                           | 0.605               | 8.547                                      | 0.169                         | 1.786                                      | 11        |
| ZIF-67                                                             | 13.69               | 0.35                                       | 3.52                          | 0.28                                       | 12        |
| Fe-MOF-GOx                                                         | 2.60                | 5.60                                       | 1.30                          | 2.50                                       | 13        |
| Fe-Ce-MOL                                                          | 0.386               | 24.4                                       | 0.588                         | 19.2                                       | 14        |
| Fe <sub>3</sub> O <sub>4</sub> -Fe <sup>0</sup> /Fe <sub>3</sub> C | 0.88                | 54.67                                      | 1.46                          | 5.67                                       | 15        |

**Table S2:** Detection limit comparison

| Materials                                         | Analyte | Method       | Time (min) | Linear range ( $\mu\text{g/L}$ ) | LOD ( $\mu\text{g/L}$ ) | Ref.      |
|---------------------------------------------------|---------|--------------|------------|----------------------------------|-------------------------|-----------|
| ZIF-67/Fe                                         | OTC     | Colorimetric | 10         | 50-1000                          | 17.78                   | this work |
|                                                   | TC      | Colorimetric | 10         | 50-1000                          | 19.71                   |           |
|                                                   | DOX     | Colorimetric | 10         | 50-1000                          | 33.39                   |           |
|                                                   | DHC     | Colorimetric | 10         | 50-1000                          | 38.05                   |           |
| UiO-66(Zr)                                        | TC      | Colorimetric | 2          | 88-8880                          | 62.1                    | 16        |
| NH <sub>2</sub> -MIL-88(B)                        | TC      | Colorimetric | 30         | 22.2-444                         | 20.42                   | 11        |
| $\alpha$ -Fe <sub>2</sub> O <sub>3</sub> QDs/TS-1 | OTC     | Colorimetric | 20         | 10-10000                         | 19.7                    | 17        |
|                                                   | DOX     | Colorimetric | 20         | 0-500                            | 23.1                    |           |
|                                                   | TC      | Colorimetric | 20         | 500-10000                        | 35.9                    |           |
| MnO <sub>2</sub> /ZnNC                            | TC      | Colorimetric | 30         | 444-88800                        | 99.54                   | 18        |
|                                                   | DOX     | Colorimetric | 30         | 444-88800                        | 198.73                  |           |
| Fe <sub>3</sub> O <sub>4</sub> nanozyme           | TC      | Colorimetric | 30         | 44.4-444                         | 19.98                   | 19        |
|                                                   | OTC     | Colorimetric | 30         | 22.2-444                         | 11.54                   |           |
|                                                   | DOX     | Colorimetric | 30         | 22.2-444                         | 21.31                   |           |
| FL-Ti <sub>3</sub> C <sub>2</sub> T <sub>x</sub>  | TC      | Colorimetric | 30         | 341-136574                       | 27                      | 20        |
| Fe/Co-MOF                                         | TC      | Colorimetric | 15         | 350-220000                       | 71.9                    | 21        |
| MIL-101(Fe)                                       | TC      | Colorimetric | 50         | 444-3552                         | 1105.5                  | 22        |
| NH <sub>2</sub> -MIL-101(Fe)                      | TC      | Colorimetric | 10         | 200-40000                        | 66.6                    | 23        |

**Table S3:** Determinations of TCs in real samples by Colorimetry and HPLC

| Samples     | Analyte | Spiked ( $\mu\text{g/L}$ ) | Colorimetry                  |              |         | HPLC                         |
|-------------|---------|----------------------------|------------------------------|--------------|---------|------------------------------|
|             |         |                            | Detected ( $\mu\text{g/L}$ ) | Recovery (%) | RSD (%) | Detected ( $\mu\text{g/L}$ ) |
| Lake water  | TC      | 50                         | 48.55 $\pm$ 3.52             | 97.10        | 7.25    | 48.33 $\pm$ 0.31             |
| Lake water  | TC      | 100                        | 102.05 $\pm$ 2.07            | 102.04       | 2.03    | 102.16 $\pm$ 0.93            |
| Lake water  | TC      | 200                        | 192.89 $\pm$ 2.23            | 96.44        | 1.15    | 195.86 $\pm$ 0.53            |
| River water | TC      | 50                         | 54.82 $\pm$ 1.7              | 109.63       | 3.10    | 51.8 $\pm$ 0.45              |
| River water | TC      | 100                        | 102.29 $\pm$ 4.48            | 102.28       | 4.38    | 100.8 $\pm$ 0.33             |
| River water | TC      | 200                        | 205.18 $\pm$ 2.99            | 102.59       | 1.45    | 202.13 $\pm$ 0.94            |
| Lake water  | OTC     | 50                         | 48.02 $\pm$ 1.81             | 96.04        | 3.77    | 49.46 $\pm$ 0.58             |
| Lake water  | OTC     | 100                        | 100.86 $\pm$ 2.82            | 100.86       | 2.79    | 101.8 $\pm$ 0.24             |
| Lake water  | OTC     | 200                        | 198.15 $\pm$ 1.44            | 99.07        | 0.72    | 201.36 $\pm$ 0.82            |
| River water | OTC     | 50                         | 54.44 $\pm$ 2.29             | 108.8        | 4.20    | 51.5 $\pm$ 0.43              |
| River water | OTC     | 100                        | 102.35 $\pm$ 1.98            | 102.34       | 1.93    | 100.16 $\pm$ 0.81            |
| River water | OTC     | 200                        | 199.63 $\pm$ 3.22            | 99.81        | 1.61    | 198.03 $\pm$ 1.27            |
| Lake water  | DOX     | 50                         | 46.33 $\pm$ 2.38             | 92.65        | 5.13    | 49.33 $\pm$ 0.31             |
| Lake water  | DOX     | 100                        | 103.06 $\pm$ 3.79            | 103.06       | 3.67    | 101.43 $\pm$ 0.63            |
| Lake water  | DOX     | 200                        | 195.31 $\pm$ 5.07            | 97.65        | 2.59    | 201.36 $\pm$ 0.86            |
| River water | DOX     | 50                         | 48.78 $\pm$ 2.89             | 97.55        | 5.91    | 49.5 $\pm$ 0.54              |
| River water | DOX     | 100                        | 105.92 $\pm$ 3.65            | 105.91       | 3.44    | 100.83 $\pm$ 0.76            |
| River water | DOX     | 200                        | 200.61 $\pm$ 2.77            | 100.30       | 1.37    | 200.2 $\pm$ 0.93             |
| Lake water  | DHC     | 50                         | 47.44 $\pm$ 2.37             | 94.88        | 4.99    | 49.46 $\pm$ 0.84             |
| Lake water  | DHC     | 100                        | 105.58 $\pm$ 2.37            | 105.58       | 2.24    | 101.8 $\pm$ 0.64             |
| Lake water  | DHC     | 200                        | 208.37 $\pm$ 2.37            | 104.18       | 1.13    | 202.43 $\pm$ 0.46            |
| River water | DHC     | 50                         | 52.56 $\pm$ 2.37             | 105.11       | 4.51    | 50.73 $\pm$ 0.49             |
| River water | DHC     | 100                        | 101.86 $\pm$ 3.09            | 101.86       | 3.02    | 99.8 $\pm$ 0.54              |
| River water | DHC     | 200                        | 212.56 $\pm$ 3.15            | 106.27       | 1.48    | 201.5 $\pm$ 0.99             |

## References

1. , <Matthias Ernzerhof. Generalized Gradient Approximation Made Simple.pdf>.
2. M. Ernzerhof and G. E. Scuseria, Assessment of the Perdew–Burke–Ernzerhof exchange–correlation functional, *The Journal of Chemical Physics*, 1999, **110**, 5029-5036.
3. S. Grimme, J. Antony, S. Ehrlich and H. Krieg, A consistent and accurateab initio parametrization of density functional dispersion correction (DFT-D) for the 94 elements H-Pu, *The Journal of Chemical Physics*, 2010, **132**.
4. S. Grimme, S. Ehrlich and L. Goerigk, Effect of the damping function in dispersion corrected density functional theory, *J. Comput. Chem.*, 2011, **32**, 1456-1465.
5. T. Lu and F. Chen, Multiwfn: A multifunctional wavefunction analyzer, *J. Comput. Chem.*, 2012, **33**, 580-592.
6. T. Lu, A comprehensive electron wavefunction analysis toolbox for chemists, Multiwfn, *The Journal of Chemical Physics*, 2024, **161**.
7. K. Momma and F. Izumi, VESTA 3 for three-dimensional visualization of crystal, volumetric and morphology data, *J. Appl. Crystallogr.*, 2011, **44**, 1272-1276.
8. L. Liu, C. Han, G. Ding, M. Yu, Y. Li, S. Liu, Y. Xie and J. Liu, Oxygen vacancies-enriched Cu/Co bimetallic oxides catalysts for high-efficiency peroxymonosulfate activation to degrade TC: Insight into the increase of Cu<sup>+</sup> triggered by Co doping, *Chem. Eng. J.*, 2022, **450**, 138302.
9. L. Gao, J. Zhuang, L. Nie, J. Zhang, Y. Zhang, N. Gu, T. Wang, J. Feng, D. Yang, S. Perrett and X. Yan, Intrinsic peroxidase-like activity of ferromagnetic nanoparticles, *Nature Nanotechnology*, 2007, **2**, 577-583.
10. Q. Chen, X. Zhang, S. Li, J. Tan, C. Xu and Y. Huang, MOF-derived Co<sub>3</sub>O<sub>4</sub>@Co-Fe oxide double-shelled nanocages as multi-functional specific peroxidase-like nanozyme catalysts for chemo/biosensing and dye degradation, *Chem. Eng. J.*, 2020, **395**, 125130.
11. Z. Li, F. Meng, R. Li, Y. Fang, Y. Cui, Y. Qin and M. Zhang, Amino-functionalized Fe(III)-Based MOF for the high-efficiency extraction and ultrasensitive colorimetric detection of tetracycline, *Biosens. Bioelectron.*, 2023, **234**, 115294.
12. S. Wang, D. Xu, L. Ma, J. Qiu, X. Wang, Q. Dong, Q. Zhang, J. Pan and Q. Liu, Ultrathin ZIF-67 nanosheets as a colorimetric biosensing platform for peroxidase-like catalysis, *Analytical and Bioanalytical Chemistry*, 2018, **410**, 7145-7152.
13. W. Xu, L. Jiao, H. Yan, Y. Wu, L. Chen, W. Gu, D. Du, Y. Lin and C. Zhu, Glucose Oxidase-Integrated Metal–Organic Framework Hybrids as Biomimetic Cascade Nanozymes for Ultrasensitive Glucose Biosensing, *ACS Applied Materials & Interfaces*, 2019, **11**, 22096-22101.
14. L. Chen, K. Yang, C. Wang, D. Han and J. Wen, Next-generation of a Fe-Ce double variable-valence metals modulated high-efficiency nanozyme, *Chemical Engineering Journal*, 2024, **495**, 153314.
15. A. F. Baye, H. Thi Nguyen and H. Kim, Fe<sup>0</sup>/Fe<sub>3</sub>C-assisted Fe<sub>3</sub>O<sub>4</sub> redox sites as robust peroxidase mimics for colorimetric detection of H<sub>2</sub>O<sub>2</sub>, *Sensors and Actuators B: Chemical*, 2023, **377**, 133097.
16. C. Shi, S. Pu, L. Wu and X. Hou, A “turn on” colorimetric system based on bimetallic UiO-66(Zr/Ce) for rapid sensing of tetracyclines through visible light triggering, *Sensors and Actuators B: Chemical*, 2023, **379**.
17. F. Meng, K. Wei, Y. Li, L. Zhang, S. Xu, X. Shi and B. Tang, Efficient synthesis of

- multifunctional  $\alpha$ -Fe<sub>2</sub>O<sub>3</sub> QDs/TS-1 as an artificial nanozyme for simultaneous colorimetric detection and photodegradation of tetracyclines, *Chem. Eng. J.*, 2024, **498**.
18. X. Li, L. Jiang, T. R. Ahmad, J. Jin, J. Chen and X. Yang, Innovative dual-oxidase nanozyme sensor array for rapid detection of tetracyclines in animal-derived foods, *J. Hazard. Mater.*, 2026, **503**, 141213.
  19. Y. Wang, Y. Sun, H. Dai, P. Ni, S. Jiang, W. Lu, Z. Li and Z. Li, A colorimetric biosensor using Fe<sub>3</sub>O<sub>4</sub> nanoparticles for highly sensitive and selective detection of tetracyclines, *Sens. Actuators B Chem.*, 2016, **236**, 621-626.
  20. W. Wang, Y. Yin and S. Gunasekaran, Nanozymatic degradation and simultaneous colorimetric detection of tetracycline, *Food Chem.*, 2023, **426**, 136607.
  21. X. Yue, C. Wu, C. Hao and Y. Bai, Defective Fe/Co-MOF with abundant oxygen vacancies as an efficient oxidase mimic for colourimetric and sensitive determination of tetracycline, *New J. Chem.*, 2024, **48**, 16323-16330.
  22. F. Niu, H. Sun, Y. Gao, S. Ding, Q. Xu, X. Dong, X. Wang, X. Zhang, X. Wang and Y. Fang, Killing two birds with one stone: a simple and integrated platform based on an Fe-MOF for dual-mode detection and photocatalytic elimination of tetracycline, *Analyst*, 2025, **150**, 3423-3430.
  23. Z. Qin, T. Peng, X. Qin, G. Liu and H. Zhang, Colorimetric/fluorescent dual-mode biosensor based on metalloporphyrin covalently modified NH<sub>2</sub>-MIL-101(Fe) with highly efficient peroxidase-like activity for the detection of tetracycline in honey samples, *Food Chem.*, 2025, **484**, 144387.
